# Supplementary material
Source: PubMed Central journal article supplement (PMC3186380)

Fig. S1. (A) Map of solvent accessibility of PDZ-L1-RGSL-L2-DH-PH. Each color block represents a deuteration level of a peptide with hydrogen/deuterium exchange quenched after 30, 100, 300, 1000, 3000, or 10,000 sec. Positions of folded domains are marked with brackets. (B) Crystal structure of a PDZ domain (PRG 37-123) color-coded according to the level of hydrogen/deuterium exchange.

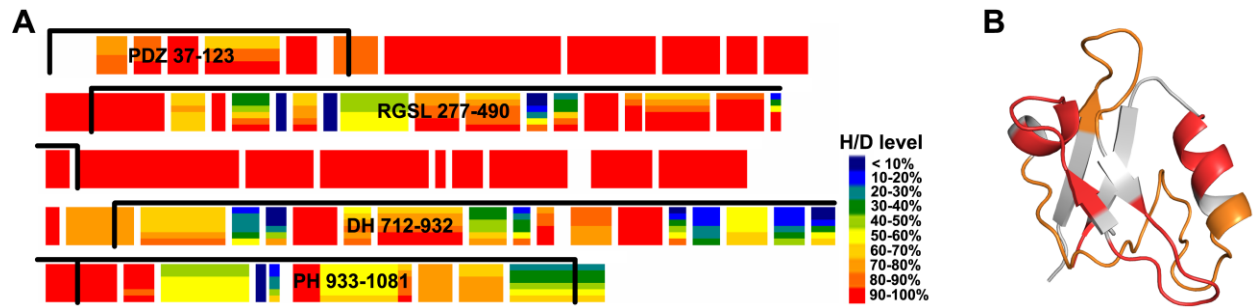

Supplement: supp_M111.270918_jbc.M111.270918-1.pdf [file supp_M111.270918_jbc.M111.270918-1.pdf]
