# Supplementary material
Source: PubMed Central journal article supplement (PMC3186380)

Fig. S2. Summary of SAXS data and models for n-DH-PH constructs. (A) Scattering profiles for n-DH-PH fragments. Experimental data, fit to *ab initio*, rigid body, and EOM models are shown as *open circles*, *yellow dotted line*, *blue solid line*, and *red dashed line*, respectively. Plots display the logarithm of the scattering intensity as a function of momentum transfer  $s = 4\pi\sin(\theta)/\lambda$ , where  $2\theta$  is the scattering angle and  $\lambda$  is the X-ray wavelength. Experimental SAXS profiles were appropriately displaced along the logarithmic axis for better visualization and overlaid with corresponding fits. (B) Distance distribution function,  $P(r)$ , of isolated n-DH-PH and n-DH-PH 4R (*black and blue dashed lines*, respectively), and n-DH-PH/RhoA complex and n-DH-PH 4R/RhoA (*red and green solid lines*, respectively). (C) Comparison of Kratky plots of n-DH-PH (*red circle*), with bovine serum albumin (*black circle*), and protein tau (*blue circle*). (D) Rigid body models (BUNCH) superposed onto the *ab initio* models (GASBOR) of isolated n-DH-PH (*left*), and n-DH-PH/RhoA complex (*right*). (E) Rigid body models (BUNCH) superposed onto the *ab initio* models (GASBOR) of isolated n-DH-PH 4R (*left*), and n-DH-PH 4R/RhoA complex (*right*). (F) Radius of gyration distribution for n-DH-PH. Distributions for pools of models are shown as *black and red solid lines*, for the isolated protein and the RhoA complex, respectively. Distributions for selected ensemble of models are shown as *black and red dashed lines*, for the isolated protein and the RhoA complex, respectively. (G) Radius of gyration distribution for n-DH-PH 4R. Distributions for pools of models are shown as *black and red solid lines*, for the isolated protein and the RhoA complex, respectively. Distributions for selected ensemble of models are shown as *black and red dashed lines*, for the isolated protein and the RhoA complex, respectively.

Figure S2

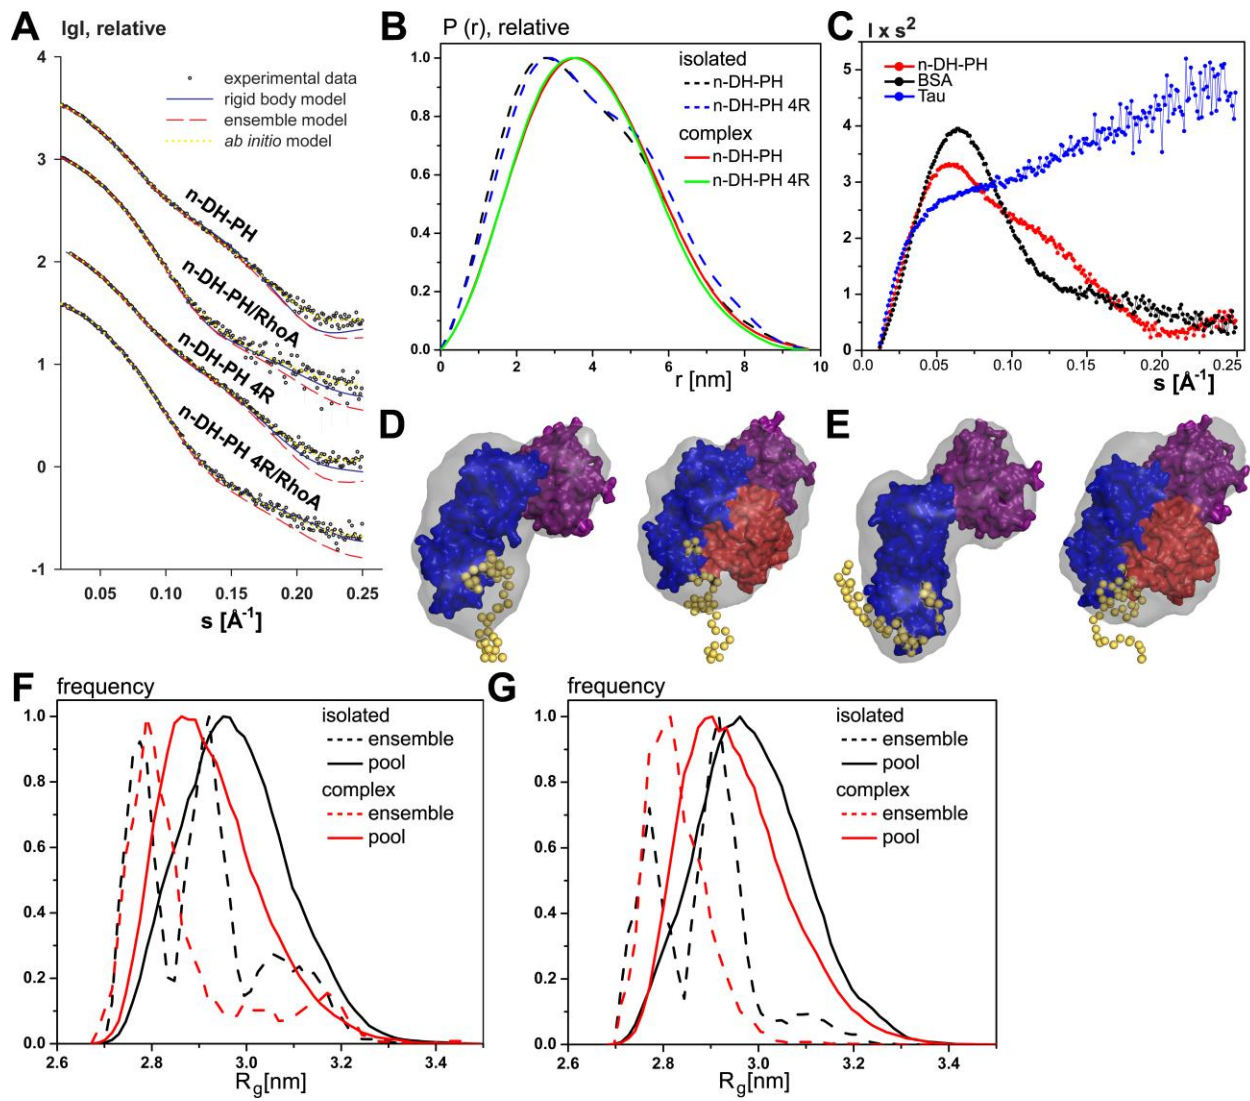

Supplement: supp_M111.270918_jbc.M111.270918-2.pdf [file supp_M111.270918_jbc.M111.270918-2.pdf]
