# Supplementary material
Source: PubMed Central journal article supplement (PMC3186380)
Supplement: supp_M111.270918_jbc.M111.270918-3.pdf [file supp_M111.270918_jbc.M111.270918-3.pdf]

Table S1. Comparison of the hydrodynamic radii of a representative set of PRG fragments with theoretical polymer models of corresponding molecular weight, representing globular, branched and linear conformations. PRDP – PDZ-L1-RGSL-L2-DH-PH; RDP – RGSL-L2-DH-PH, PR – PDZ-L1-RGSL.

|                                               | <b>Model</b>                                                                                  | <b>PRDP<br/>(118 kDa)</b> | <b>PRDP/RhoA<br/>(139 kDa)</b> | <b>RDP<br/>(118 kDa)</b> | <b>RDP/RhoA<br/>(139 kDa)</b> | <b>PR<br/>(49 kDa)</b> |
|-----------------------------------------------|-----------------------------------------------------------------------------------------------|---------------------------|--------------------------------|--------------------------|-------------------------------|------------------------|
| <b>Expected <math>R_h</math><br/>[nm]</b>     | globular<br>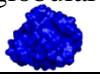 | <b>4.6</b>                | <b>4.9</b>                     | <b>4.1</b>               | <b>4.5</b>                    | <b>3.1</b>             |
|                                               | branched<br> | <b>6.3</b>                | <b>6.7</b>                     | <b>5.6</b>               | <b>6.2</b>                    | <b>4.2</b>             |
|                                               | linear<br>   | <b>9.4</b>                | <b>10.3</b>                    | <b>8.2</b>               | <b>9.2</b>                    | <b>5.8</b>             |
| <b>Experimental<br/><math>R_h</math> [nm]</b> |                                                                                               | <b>7.7</b>                | <b>7.2</b>                     | <b>6.3</b>               | <b>6.0</b>                    | <b>5.1</b>             |
